# Supplementary material for: Comparing the Infectivity of Recent SARS-CoV-2 Omicron Sub-Variants in Syrian Hamsters
Source: MDPI journal article supplement (doi:10.3390/v16010122), 2024-01-14
Supplement: s1 [file s1]

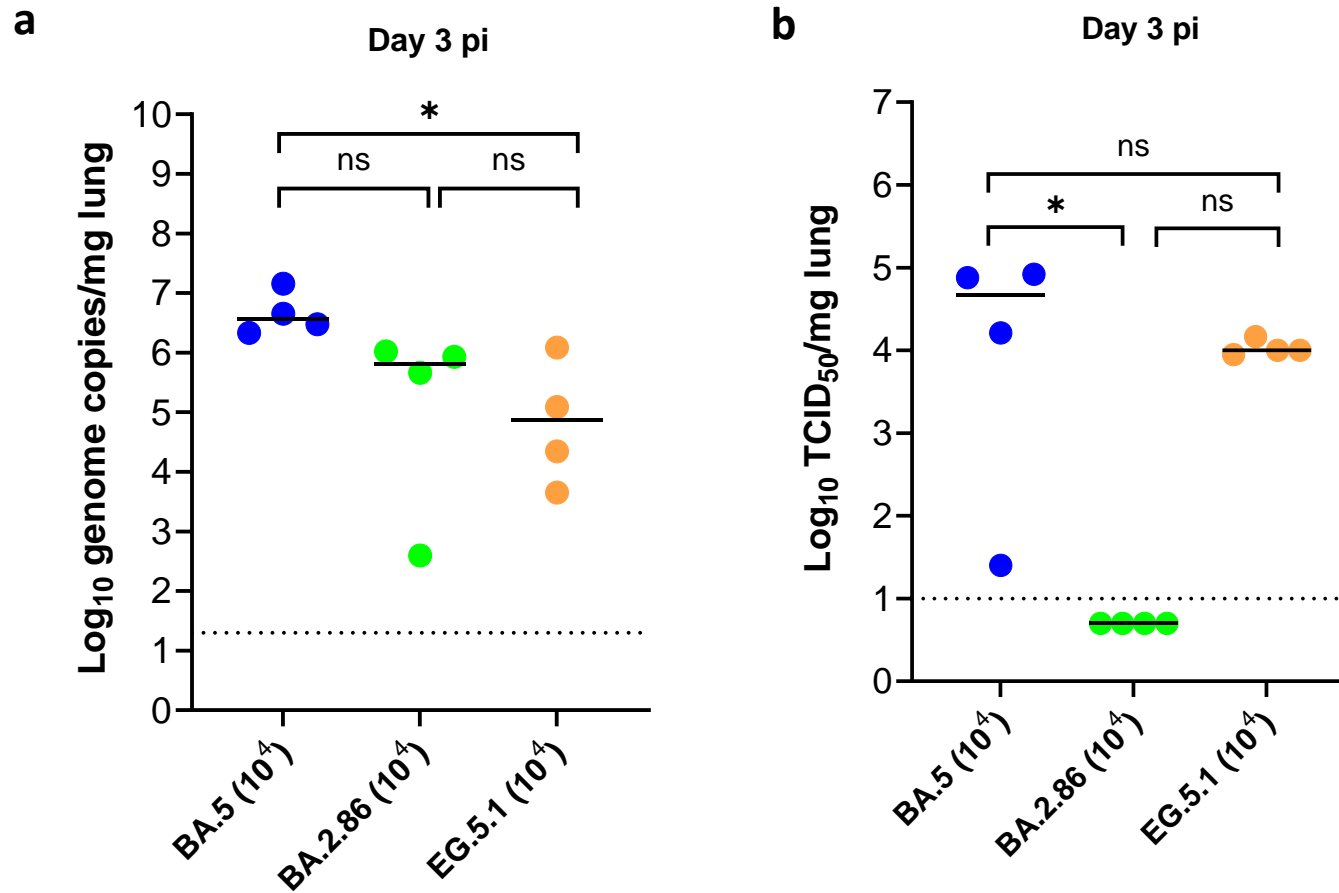

**Figure S1:** Viral loads in the lungs of Syrian hamsters following infection with different omicron SARS-CoV-2 variants on day 3 post-infection. (a) Viral RNA levels in the lungs of hamsters infected with 10<sup>4</sup> TCID<sub>50</sub> of BA.5, BA.2.86 or EG.5.1 omicron SARS-CoV-2 variants on day 3 post-infection (pi) are expressed as log<sub>10</sub> SARS-CoV-2 RNA copies per mg lung tissue. Individual data and median values are presented. (b) Infectious viral loads in the lungs of infected hamsters on day 3 pi are expressed as log<sub>10</sub> TCID<sub>50</sub> per mg lung tissue. Individual data and median values are presented. Data were analyzed with the Kruskal-Wallis test, \*P<0.05, ns=non-significant. The data are from one experiment with n=4 per group.
